# Supplementary material for: Clinical Significance of Elevated Xanthine Dehydrogenase Levels and Hyperuricemia in Patients with Sepsis
Source: MDPI journal article supplement (doi:10.3390/ijms241813857), 2023-09-08
Supplement: s1 [file s1]

Supplementary Table S1 Validation of the prediction of blood XDH levels

| Distribution                        | Values      | Training cohort     | Test cohort         |
|-------------------------------------|-------------|---------------------|---------------------|
| In case of training:<br>test=4:1 *  | AUC (95%CI) | 0.79<br>(0.62-0.89) | 0.92<br>(0.57-0.99) |
| In case of training:<br>test=2:1 ** | AUC (95%CI) | 0.76<br>(0.54-0.89) | 0.92<br>(0.68-0.98) |

\* In total, patients enrolled in the first four-fifths of the study period were selected for the training group (n=44), and the remaining patients in the last fifth (n=12) were selected for the test group.

\* \* In total, patients enrolled in the first two-thirds of the study period were selected for the training group (n=37), and the remaining patients in the last third (n=19) were selected for the test group.

Our study cases of the data were split 4:1 or 2:1 (random assignment) and obtained AUC values and 95% confidence intervals for the training and test groups, respectively, using the bootstrap method. The upper part of the table below shows the results of the 4:1 split, while the lower part of the table shows the results of the 2:1 split.

In both distribution method studies, the 95% confidence intervals of the AUC were decreased in the training cohort and increased in the test cohort compared to the original predictive outcome of blood XDH levels (AUC=0.81).
